# Supplementary material for: Genetic Mapping to Detect Stringent QTLs Using 1k-RiCA SNP Genotyping Platform from the New Landrace Associated with Salt Tolerance at the Seedling Stage in Rice
Source: MDPI journal article supplement (doi:10.3390/plants11111409), 2022-05-26
Supplement: s1 [file s1]

Table S1: List of SNPs (**SNP ID**) using in the QTL analysis

| <b>SNP Code</b> | <b>SNP ID</b> | <b>SNP Code</b> | <b>SNP ID</b>  | <b>SNP Code</b> | <b>SNP ID</b>       |
|-----------------|---------------|-----------------|----------------|-----------------|---------------------|
| C1              | chr01_194844  | C24             | chr01_9164508  | C47             | chr01_16596849      |
| C2              | chr01_375814  | C25             | chr01_10100605 | C48             | chr01_17008280      |
| C3              | chr01_717702  | C26             | chr01_10202227 | C49             | chr01_17219764      |
| C4              | chr01_932866  | C27             | chr01_10645259 | C50             | chr01_17426109      |
| C5              | chr01_1044946 | C28             | chr01_10846090 | C51             | chr01_18102213      |
| C6              | chr01_1175585 | C29             | chr01_11250486 | C52             | chr01_18332445      |
| C7              | chr01_1532281 | C30             | SALTOL-AUS     | C53             | chr01_18501890      |
| C8              | chr01_2100471 | C31             | SALTOL-ARO     | C54             | chr01_19008526      |
| C9              | chr01_2277961 | C32             | chr01_12216652 | C55             | chr01_19308987      |
| C10             | chr01_2532252 | C33             | chr01_12335190 | C56             | chr01_20262103      |
| C11             | chr01_2726468 | C34             | chr01_12809255 | C57             | chr01_20418175      |
| C12             | chr01_2865232 | C35             | chr01_12941687 | C58             | chr01_20562598      |
| C13             | chr01_3236648 | C36             | chr01_13442034 | C59             | chr01_21011077      |
| C14             | chr01_3529691 | C37             | chr01_13777831 | C60             | chr01_22554065      |
| C15             | chr01_4167976 | C38             | chr01_13902629 | C61             | IRGSP1_C01_22891448 |
| C16             | chr01_4307004 | C39             | chr01_14375630 | C62             | chr01_23091103      |
| C17             | chr01_5064126 | C40             | chr01_14508449 | C63             | chr01_23240729      |
| C18             | chr01_5510350 | C41             | chr01_14937939 | C64             | chr01_23656773      |
| C19             | chr01_6130240 | C42             | chr01_15092392 | C65             | IRGSP1_C01_23735018 |
| C20             | chr01_6543217 | C43             | chr01_15393352 | C66             | chr01_24050118      |
| C21             | chr01_7068516 | C44             | chr01_15883941 | C67             | chr01_24722142      |
| C22             | chr01_7563923 | C45             | chr01_16113201 | C68             | chr01_26187514      |

|             |                |             |                |             |                    |
|-------------|----------------|-------------|----------------|-------------|--------------------|
| C23         | chr01_8760562  | C46         | chr01_16284866 | C69         | chr01_27046296     |
| SNP<br>Code | SNP Id.        | SNP<br>Code | SNP Id.        | SNP<br>Code | SNP Id.            |
| C70         | chr01_27330724 | C93         | chr01_37680628 | C116        | chr02_316859       |
| C71         | chr01_28142020 | C94         | chr01_37920337 | C117        | chr02_494373       |
| C72         | chr01_28478660 | C95         | DTY1-1_1       | C118        | chr02_629512       |
| C73         | chr01_28826738 | C96         | DTY1-1_2       | C119        | chr02_890901       |
| C74         | chr01_30569798 | C97         | chr01_38632196 | C120        | DTY2-2_1           |
| C75         | chr01_31396842 | C98         | DTY1-1_3       | C121        | MS-IR36            |
| C76         | chr01_32041358 | C99         | SCT1_1         | C122        | chr02_1082416      |
| C77         | chr01_32359998 | C100        | SCT1_2         | C123        | chr02_1380527      |
| C78         | chr01_32563460 | C101        | QSES1-2_1      | C124        | chr02_1487009      |
| C79         | chr01_32766139 | C102        | SCT1_3         | C125        | chr02_1660713      |
| C80         | chr01_33164035 | C103        | SCT1_4         | C126        | chr02_2008370      |
| C81         | chr01_33472174 | C104        | chr01_39548506 | C127        | chr02_2334960      |
| C82         | chr01_33695501 | C105        | QSES1-2_2      | C128        | DTY2-2_2           |
| C83         | chr01_33901317 | C106        | chr01_39955529 | C129        | chr02_2819095      |
| C84         | chr01_34201543 | C107        | QSES1-2_3      | C130        | chr02_2983451      |
| C85         | chr01_34363755 | C108        | QSES1-2_4      | C131        | chr02_3136771      |
| C86         | chr01_34508997 | C109        | chr01_40699488 | C132        | chr02_3477202      |
| C87         | chr01_35259107 | C110        | chr01_41020155 | C133        | chr02_3830712      |
| C88         | chr01_35589637 | C111        | chr01_41911439 | C134        | chr02_4047646      |
| C89         | chr01_35794891 | C112        | chr01_42425574 | C135        | chr02_4342883      |
| C90         | chr01_36150523 | C113        | chr01_42877440 | C136        | IRGSP1_C02_4549475 |
| C91         | chr01_36419842 | C114        | chr01_43074709 | C137        | chr02_4823175      |

|          |                |          |                     |          |                     |
|----------|----------------|----------|---------------------|----------|---------------------|
| C92      | chr01_37274755 | C115     | chr02_103273        | C138     | DTY2-2_3            |
| SNP Code | SNP Id.        | SNP Code | SNP Id.             | SNP Code | SNP Id.             |
| C139     | chr02_4930742  | C162     | chr02_19642635      | C185     | chr02_28778297      |
| C140     | chr02_5836334  | C163     | chr02_19981768      | C186     | chr02_29011747      |
| C141     | chr02_6373446  | C164     | chr02_20145859      | C187     | chr02_29415200      |
| C142     | chr02_6805305  | C165     | chr02_20824958      | C188     | chr02_29568762      |
| C143     | chr02_7238793  | C166     | chr02_21060669      | C189     | chr02_29718772      |
| C144     | chr02_7342223  | C167     | chr02_21832777      | C190     | chr02_30345735      |
| C145     | chr02_8019748  | C168     | chr02_22340836      | C191     | chr02_30530432      |
| C146     | chr02_8814718  | C169     | chr02_23073414      | C192     | chr02_31135814      |
| C147     | chr02_9570228  | C170     | IRGSP1_C02_23246863 | C193     | chr02_31403314      |
| C148     | chr02_9801099  | C171     | chr02_23396915      | C194     | chr02_31678155      |
| C149     | chr02_9975660  | C172     | chr02_23538743      | C195     | chr02_31914486      |
| C150     | HIS1           | C173     | chr02_23852677      | C196     | chr02_32101050      |
| C151     | chr02_10555263 | C174     | chr02_24168273      | C197     | chr02_32303539      |
| C152     | chr02_10874369 | C175     | chr02_24264653      | C198     | chr02_33035683      |
| C153     | chr02_11701123 | C176     | chr02_24772301      | C199     | chr02_34072964      |
| C154     | chr02_13962476 | C177     | chr02_24887320      | C200     | chr02_34425408      |
| C155     | chr02_16464872 | C178     | chr02_25193353      | C201     | chr02_34707946      |
| C156     | chr02_16919033 | C179     | chr02_25415397      | C202     | IRGSP1_C02_34852782 |
| C157     | chr02_17160895 | C180     | chr02_25949636      | C203     | chr02_34865754      |
| C158     | chr02_17497082 | C181     | chr02_26406867      | C204     | chr02_34868096      |
| C159     | chr02_17789129 | C182     | chr02_27548893      | C205     | chr02_35216781      |
| C160     | chr02_18370293 | C183     | chr02_28049479      | C206     | chr02_35401891      |

|          |                    |          |                     |          |                |
|----------|--------------------|----------|---------------------|----------|----------------|
| C161     | chr02_18811812     | C184     | chr02_28211032      | C207     | chr02_35568365 |
| SNP Code | SNP Id.            | SNP Code | SNP Id.             | SNP Code | SNP Id.        |
| C208     | chr02_35818319     | C231     | chr03_8532555       | C254     | chr03_17827706 |
| C209     | chr03_484812       | C232     | chr03_8711509       | C255     | chr03_18273682 |
| C210     | chr03_851785       | C233     | chr03_9026803       | C256     | chr03_18629240 |
| C211     | chr03_1270943      | C234     | chr03_9375374       | C257     | chr03_19667207 |
| C212     | DTY3-2-SWARNA_1    | C235     | chr03_9636224       | C258     | chr03_19929911 |
| C213     | DTY3-2-IR64_1      | C236     | chr03_9751213       | C259     | chr03_20664396 |
| C214     | DTY3-2-N22_1       | C237     | chr03_9878813       | C260     | chr03_21003404 |
| C215     | chr03_1481412      | C238     | chr03_10184356      | C261     | chr03_22050510 |
| C216     | chr03_1761412      | C239     | chr03_10304250      | C262     | chr03_22633713 |
| C217     | chr03_2151496      | C240     | chr03_10544320      | C263     | chr03_23037368 |
| C218     | chr03_2885423      | C241     | chr03_10798982      | C264     | chr03_23354868 |
| C219     | chr03_3382980      | C242     | chr03_11644944      | C265     | chr03_23851835 |
| C220     | chr03_3657643      | C243     | chr03_11851886      | C266     | chr03_24413888 |
| C221     | chr03_4047654      | C244     | chr03_12564300      | C267     | chr03_24682521 |
| C222     | chr03_4321231      | C245     | chr03_13224089      | C268     | chr03_25157655 |
| C223     | chr03_5109298      | C246     | chr03_13932387      | C269     | chr03_25259336 |
| C224     | chr03_5880211      | C247     | chr03_14169727      | C270     | chr03_25530777 |
| C225     | chr03_6283461      | C248     | chr03_14554651      | C271     | chr03_25833182 |
| C226     | chr03_6902921      | C249     | IRGSP1_C03_14933451 | C272     | chr03_26334305 |
| C227     | chr03_7200676      | C250     | chr03_15072791      | C273     | chr03_26456796 |
| C228     | chr03_7605347      | C251     | chr03_15365726      | C274     | chr03_26982172 |
| C229     | IRGSP1_C03_7752789 | C252     | GS3                 | C275     | chr03_27275567 |

|             |                |             |                    |             |                |
|-------------|----------------|-------------|--------------------|-------------|----------------|
| C230        | chr03_7798537  | C253        | chr03_17307455     | C276        | chr03_27494934 |
| SNP<br>Code | SNP Id.        | SNP<br>Code | SNP Id.            | SNP<br>Code | SNP Id.        |
| C277        | chr03_27813704 | C300        | chr03_35824355     | C323        | chr04_7871436  |
| C278        | chr03_28851199 | C301        | chr03_36206765     | C324        | chr04_8217877  |
| C279        | chr03_29152266 | C302        | DTY4-1_1           | C325        | chr04_10077188 |
| C280        | chr03_29430694 | C303        | chr04_193676       | C326        | chr04_10468507 |
| C281        | chr03_30247826 | C304        | IRGSP1_C04_602842  | C327        | chr04_10991011 |
| C282        | chr03_30604896 | C305        | DTY4-1_2           | C328        | chr04_11645506 |
| C283        | chr03_31025197 | C306        | chr04_1022225      | C329        | chr04_11879947 |
| C284        | DTY3-1_2       | C307        | chr04_1136986      | C330        | chr04_12594753 |
| C285        | chr03_31190989 | C308        | chr04_1719865      | C331        | chr04_12665796 |
| C286        | DTY3-1_4       | C309        | DTY4-1_3           | C332        | chr04_12684621 |
| C287        | chr03_31427789 | C310        | chr04_3411505      | C333        | chr04_12711415 |
| C288        | chr03_31614921 | C311        | IRGSP1_C04_4319691 | C334        | chr04_12955347 |
| C289        | chr03_32063693 | C312        | chr04_4456304      | C335        | chr04_13551673 |
| C290        | chr03_32430702 | C313        | chr04_5111222      | C336        | chr04_13665093 |
| C291        | chr03_32577650 | C314        | chr04_5526487      | C337        | chr04_14229856 |
| C292        | chr03_32832500 | C315        | chr04_6027557      | C338        | chr04_14814591 |
| C293        | chr03_33080942 | C316        | chr04_6596219      | C339        | chr04_15389648 |
| C294        | chr03_33713486 | C317        | chr04_6913215      | C340        | chr04_15944977 |
| C295        | chr03_34275405 | C318        | BPH17_1            | C341        | chr04_16289829 |
| C296        | chr03_34476308 | C319        | BPH17_3            | C342        | chr04_16715200 |
| C297        | chr03_34678981 | C320        | BPH17_2            | C343        | chr04_17465113 |
| C298        | chr03_35093761 | C321        | chr04_7170237      | C344        | chr04_17666183 |

|          |                |          |                |          |                |
|----------|----------------|----------|----------------|----------|----------------|
| C299     | chr03_35636092 | C322     | chr04_7304413  | C345     | chr04_18136052 |
| SNP Code | SNP Id.        | SNP Code | SNP Id.        | SNP Code | SNP Id.        |
| C346     | chr04_18706317 | C369     | chr04_29533215 | C392     | chr05_1487229  |
| C347     | chr04_19123643 | C370     | chr04_29715617 | C393     | chr05_1832604  |
| C348     | chr04_19353709 | C371     | chr04_29881066 | C394     | chr05_2045112  |
| C349     | chr04_20507218 | C372     | chr04_30174083 | C395     | chr05_2291156  |
| C350     | chr04_21237749 | C373     | COLD1-JAP      | C396     | chr05_3092113  |
| C351     | chr04_21517348 | C374     | chr04_30438901 | C397     | chr05_3470087  |
| C352     | chr04_21864875 | C375     | chr04_30879875 | C398     | chr05_3817643  |
| C353     | chr04_22435296 | C376     | NAL1           | C399     | chr05_4205413  |
| C354     | chr04_22808095 | C377     | TBV1_2         | C400     | chr05_4589783  |
| C355     | chr04_23046635 | C378     | chr04_31509863 | C401     | chr05_4819475  |
| C356     | chr04_23248365 | C379     | chr04_32038496 | C402     | chr05_4953754  |
| C357     | chr04_23846299 | C380     | chr04_32189893 | C403     | GW5_1          |
| C358     | chr04_24061518 | C381     | chr04_33073892 | C404     | GW5_2          |
| C359     | RYMV1-5        | C382     | chr04_33448911 | C405     | chr05_6129755  |
| C360     | RYMV1-2        | C383     | chr04_34643455 | C406     | chr05_6544781  |
| C361     | chr04_25245272 | C384     | chr04_34925111 | C407     | chr05_6607675  |
| C362     | chr04_25437295 | C385     | chr04_35395197 | C408     | chr05_6833061  |
| C363     | chr04_26309089 | C386     | chr05_44806    | C409     | chr05_7195992  |
| C364     | chr04_26545849 | C387     | chr05_201193   | C410     | chr05_7328783  |
| C365     | chr04_26832471 | C388     | chr05_437499   | C411     | chr05_7706179  |
| C366     | chr04_27540988 | C389     | chr05_440644   | C412     | chr05_8080666  |
| C367     | chr04_28004788 | C390     | chr05_661832   | C413     | chr05_8384781  |

|          |                     |          |                |          |               |
|----------|---------------------|----------|----------------|----------|---------------|
| C368     | chr04_28901886      | C391     | chr05_922530   | C414     | chr05_8585466 |
| SNP Code | SNP Id.             | SNP Code | SNP Id.        | SNP Code | SNP Id.       |
| C415     | chr05_9712988       | C438     | chr05_20551103 | C461     | chr06_1521855 |
| C416     | chr05_10539124      | C439     | chr05_21494622 | C462     | WX-OP         |
| C417     | chr05_10886331      | C440     | chr05_22295097 | C463     | WX-INT        |
| C418     | chr05_11679660      | C441     | chr05_22711811 | C464     | chr06_1768006 |
| C419     | chr05_13325546      | C442     | chr05_23143060 | C465     | WX-A_GROUP    |
| C420     | chr05_13768744      | C443     | chr05_23661597 | C466     | WX-A-RC222    |
| C421     | IRGSP1_C05_13854594 | C444     | chr05_24090514 | C467     | chr06_1768998 |
| C422     | chr05_14412355      | C445     | chr05_25234430 | C468     | chr06_2430760 |
| C423     | chr05_14928105      | C446     | chr05_27086886 | C469     | chr06_2535102 |
| C424     | chr05_16262586      | C447     | chr05_27531788 | C470     | chr06_2783620 |
| C425     | chr05_16500527      | C448     | chr05_27627633 | C471     | chr06_2808467 |
| C426     | chr05_16752221      | C449     | chr05_27899049 | C472     | chr06_3140863 |
| C427     | chr05_16955234      | C450     | chr05_28101376 | C473     | chr06_3244503 |
| C428     | chr05_17012134      | C451     | chr05_28344771 | C474     | chr06_3431721 |
| C429     | chr05_17017106      | C452     | chr05_28772543 | C475     | chr06_3598843 |
| C430     | chr05_18405433      | C453     | chr05_29100308 | C476     | chr06_3632725 |
| C431     | chr05_18816269      | C454     | chr06_244274   | C477     | chr06_3721346 |
| C432     | chr05_19098650      | C455     | chr06_400753   | C478     | chr06_3951547 |
| C433     | chr05_19155333      | C456     | chr06_646915   | C479     | chr06_4076903 |
| C434     | chr05_19516545      | C457     | chr06_677288   | C480     | chr06_4641044 |
| C435     | chr05_19723342      | C458     | BPH32          | C481     | chr06_4757948 |
| C436     | chr05_19974373      | C459     | chr06_1272777  | C482     | chr06_5195334 |

|             |                |             |                |             |                |
|-------------|----------------|-------------|----------------|-------------|----------------|
| C437        | chr05_20331215 | C460        | chr06_1378891  | C483        | chr06_5707236  |
| SNP<br>Code | SNP Id.        | SNP<br>Code | SNP Id.        | SNP<br>Code | SNP Id.        |
| C484        | chr06_5894169  | C507        | chr06_16806254 | C530        | XA7_3          |
| C485        | chr06_6093491  | C508        | chr06_17076390 | C531        | chr06_28201282 |
| C486        | chr06_6508525  | C509        | chr06_17698448 | C532        | chr06_28723997 |
| C487        | SSIIA-3B       | C510        | chr06_19989362 | C533        | chr06_29056693 |
| C488        | chr06_7629011  | C511        | chr06_20462203 | C534        | chr06_29208264 |
| C489        | chr06_8153078  | C512        | chr06_21246829 | C535        | chr06_29416997 |
| C490        | chr06_8405025  | C513        | chr06_21491695 | C536        | chr06_30809492 |
| C491        | chr06_9222038  | C514        | chr06_21818860 | C537        | chr07_514293   |
| C492        | chr06_9836381  | C515        | chr06_22371041 | C538        | chr07_770090   |
| C493        | chr06_10006906 | C516        | chr06_24003856 | C539        | chr07_940832   |
| C494        | PI9_1          | C517        | TGW6           | C540        | chr07_1058718  |
| C495        | chr06_10418594 | C518        | chr06_25277863 | C541        | chr07_1195861  |
| C496        | chr06_10966744 | C519        | chr06_26139965 | C542        | chr07_1317761  |
| C497        | chr06_11131403 | C520        | chr06_26513610 | C543        | chr07_1432567  |
| C498        | chr06_11692013 | C521        | chr06_26938344 | C544        | chr07_1558687  |
| C499        | chr06_12989252 | C522        | chr06_27275515 | C545        | chr07_1865306  |
| C500        | chr06_13702743 | C523        | chr06_27364485 | C546        | chr07_2128881  |
| C501        | chr06_14006726 | C524        | chr06_27627615 | C547        | chr07_2331583  |
| C502        | chr06_14504992 | C525        | chr06_27761109 | C548        | chr07_4481788  |
| C503        | chr06_15358704 | C526        | XA7_1          | C549        | chr07_5442983  |
| C504        | chr06_15538142 | C527        | XA7_2          | C550        | chr07_5729056  |
| C505        | chr06_16304717 | C528        | chr06_28100960 | C551        | chr07_6029723  |



|             |                     |             |                |             |               |
|-------------|---------------------|-------------|----------------|-------------|---------------|
| C506        | chr06_16614854      | C529        | chr06_28107682 | C552        | chr07_7317122 |
| SNP<br>Code | SNP Id.             | SNP<br>Code | SNP Id.        | SNP<br>Code | SNP Id.       |
| C553        | chr07_8140854       | C576        | chr07_23087994 | C599        | chr08_2878924 |
| C554        | chr07_8320872       | C577        | AG3_1          | C600        | chr08_3212821 |
| C555        | chr07_8487862       | C578        | chr07_23535052 | C601        | chr08_3365127 |
| C556        | GHD7-4              | C579        | chr07_23785728 | C602        | chr08_3682006 |
| C557        | chr07_11290725      | C580        | AG3_2          | C603        | chr08_3866523 |
| C558        | chr07_13639513      | C581        | chr07_24194267 | C604        | chr08_4190544 |
| C559        | chr07_14729119      | C582        | chr07_24313817 | C605        | DTH8-IR24     |
| C560        | chr07_15340454      | C583        | chr07_24507157 | C606        | chr08_4511882 |
| C561        | IRGSP1_C07_16037152 | C584        | chr07_25339609 | C607        | chr08_4853081 |
| C562        | chr07_16313631      | C585        | chr07_25935801 | C608        | GM4_1         |
| C563        | chr07_17654305      | C586        | chr07_27021585 | C609        | chr08_5394572 |
| C564        | chr07_17877865      | C587        | chr07_27883987 | C610        | GM4_3         |
| C565        | chr07_18208798      | C588        | chr07_28187994 | C611        | GM4_4         |
| C566        | chr07_18503646      | C589        | chr07_28409912 | C612        | chr08_5634800 |
| C567        | chr07_18689329      | C590        | chr07_29062014 | C613        | PI33_1        |
| C568        | chr07_18895399      | C591        | chr08_213580   | C614        | chr08_6269190 |
| C569        | IRGSP1_C07_19408599 | C592        | chr08_658032   | C615        | PI33_2        |
| C570        | chr07_20514892      | C593        | chr08_811201   | C616        | PI33_3        |
| C571        | chr07_21135004      | C594        | chr08_1088007  | C617        | chr08_7854002 |
| C572        | chr07_21539524      | C595        | chr08_1198055  | C618        | chr08_7950638 |
| C573        | TSV1_UM             | C596        | chr08_1836529  | C619        | chr08_8386031 |
| C574        | chr07_22277144      | C597        | chr08_2208785  | C620        | chr08_8580913 |

|             |                     |             |                     |             |                     |
|-------------|---------------------|-------------|---------------------|-------------|---------------------|
| C575        | chr07_22593213      | C598        | chr08_2673447       | C621        | chr08_8703041       |
| SNP<br>Code | SNP Id.             | SNP<br>Code | SNP Id.             | SNP<br>Code | SNP Id.             |
| C622        | chr08_8897653       | C645        | chr08_15439243      | C668        | chr08_25467581      |
| C623        | chr08_9289473       | C646        | chr08_16618829      | C669        | chr08_25757847      |
| C624        | chr08_9769758       | C647        | chr08_16799413      | C670        | PGWC8-2             |
| C625        | chr08_10105233      | C648        | chr08_17319167      | C671        | chr08_26448560      |
| C626        | chr08_10188041      | C649        | chr08_17618902      | C672        | XA13_2              |
| C627        | chr08_10358484      | C650        | chr08_18108496      | C673        | XA13_1              |
| C628        | IRGSP1_C08_10441781 | C651        | chr08_18221884      | C674        | chr08_26709228      |
| C629        | chr08_11248949      | C652        | chr08_18552226      | C675        | chr08_26755059      |
| C630        | chr08_11370680      | C653        | chr08_18719247      | C676        | chr08_26898822      |
| C631        | chr08_11565636      | C654        | chr08_19351882      | C677        | chr08_27039158      |
| C632        | chr08_11727432      | C655        | chr08_19833397      | C678        | IRGSP1_C08_27133000 |
| C633        | chr08_11888511      | C656        | chr08_20053642      | C679        | chr08_27282645      |
| C634        | chr08_12145970      | C657        | chr08_21011651      | C680        | chr08_27563586      |
| C635        | chr08_12421145      | C658        | chr08_21253397      | C681        | chr08_28125942      |
| C636        | chr08_12723619      | C659        | chr08_21667240      | C682        | chr09_148594        |
| C637        | chr08_13017690      | C660        | chr08_22252502      | C683        | chr09_496013        |
| C638        | chr08_13354771      | C661        | chr08_22776414      | C684        | chr09_591085        |
| C639        | chr08_13741571      | C662        | chr08_23713744      | C685        | chr09_1098249       |
| C640        | chr08_13950899      | C663        | chr08_24125399      | C686        | chr09_1467951       |
| C641        | chr08_14184612      | C664        | chr08_24205833      | C687        | chr09_2096551       |
| C642        | chr08_14676962      | C665        | chr08_24753844      | C688        | chr09_2298381       |
| C643        | chr08_14799421      | C666        | IRGSP1_C08_24853648 | C689        | chr09_2380203       |

|             |                    |             |                |             |                |
|-------------|--------------------|-------------|----------------|-------------|----------------|
| C644        | chr08_14986111     | C667        | WFP1           | C690        | chr09_2930321  |
| SNP<br>Code | SNP Id.            | SNP<br>Code | SNP Id.        | SNP<br>Code | SNP Id.        |
| C691        | chr09_3357568      | C714        | chr09_10757351 | C737        | chr09_21667022 |
| C692        | chr09_3603443      | C715        | chr09_11237877 | C738        | chr09_21885499 |
| C693        | chr09_3934768      | C716        | chr09_11746684 | C739        | chr09_21896910 |
| C694        | chr09_4136552      | C717        | chr09_11848827 | C740        | chr09_22076185 |
| C695        | chr09_4347203      | C718        | AG1_1          | C741        | chr10_146531   |
| C696        | chr09_5008706      | C719        | chr09_12029697 | C742        | chr10_790044   |
| C697        | chr09_5305969      | C720        | chr09_12326525 | C743        | chr10_1562931  |
| C698        | chr09_5812738      | C721        | chr09_14920092 | C744        | chr10_2129424  |
| C699        | chr09_5922125      | C722        | chr09_15322775 | C745        | chr10_2258418  |
| C700        | chr09_6093984      | C723        | chr09_15429734 | C746        | chr10_3358419  |
| C701        | IRGSP1_C09_6205891 | C724        | DEP1-1         | C747        | chr10_3400212  |
| C702        | chr09_6252407      | C725        | DEP1-2         | C748        | chr10_4019997  |
| C703        | chr09_6796269      | C726        | chr09_16616509 | C749        | chr10_4281052  |
| C704        | chr09_6913547      | C727        | chr09_17213519 | C750        | chr10_5257224  |
| C705        | chr09_7116276      | C728        | chr09_17447522 | C751        | chr10_5488256  |
| C706        | chr09_7280339      | C729        | chr09_17707080 | C752        | chr10_5826161  |
| C707        | chr09_8511436      | C730        | chr09_19322095 | C753        | chr10_6648158  |
| C708        | chr09_8851945      | C731        | chr09_19683788 | C754        | chr10_6798684  |
| C709        | chr09_9252104      | C732        | chr09_20138174 | C755        | chr10_7120214  |
| C710        | chr09_9626056      | C733        | chr09_20682114 | C756        | chr10_7397104  |
| C711        | chr09_9945591      | C734        | chr09_21148430 | C757        | chr10_7530092  |
| C712        | chr09_10119114     | C735        | chr09_21348882 | C758        | chr10_8404652  |

|             |                     |             |                |             |                |
|-------------|---------------------|-------------|----------------|-------------|----------------|
| C713        | chr09_10324014      | C736        | chr09_21612758 | C759        | chr10_8795028  |
| SNP<br>Code | SNP Id.             | SNP<br>Code | SNP Id.        | SNP<br>Code | SNP Id.        |
| C760        | chr10_9095431       | C783        | chr10_18852690 | C806        | chr11_8601502  |
| C761        | chr10_10476379      | C784        | chr10_19025553 | C807        | chr11_8786491  |
| C762        | chr10_10755400      | C785        | chr10_19217152 | C808        | chr11_9183139  |
| C763        | chr10_11195773      | C786        | chr10_19378143 | C809        | chr11_9413614  |
| C764        | chr10_11664750      | C787        | chr10_19421322 | C810        | chr11_9561302  |
| C765        | chr10_11918679      | C788        | chr10_19678268 | C811        | chr11_9933184  |
| C766        | IRGSP1_C10_12035291 | C789        | chr10_19899160 | C812        | chr11_10741559 |
| C767        | chr10_12145295      | C790        | chr10_21338558 | C813        | chr11_11715177 |
| C768        | chr10_12658334      | C791        | chr10_21596449 | C814        | chr11_12142966 |
| C769        | chr10_12780901      | C792        | chr11_256688   | C815        | chr11_12583306 |
| C770        | chr10_13551338      | C793        | chr11_650148   | C816        | chr11_13020856 |
| C771        | chr10_13778768      | C794        | chr11_2393690  | C817        | chr11_13926471 |
| C772        | chr10_14086902      | C795        | chr11_2875870  | C818        | chr11_14737362 |
| C773        | chr10_14640458      | C796        | chr11_3516253  | C819        | chr11_15447862 |
| C774        | chr10_14777004      | C797        | chr11_3802930  | C820        | chr11_15638505 |
| C775        | chr10_15824876      | C798        | chr11_4783262  | C821        | chr11_15850522 |
| C776        | chr10_16229530      | C799        | chr11_5615885  | C822        | chr11_16284824 |
| C777        | chr10_16742656      | C800        | chr11_5852961  | C823        | chr11_17047762 |
| C778        | chr10_17397576      | C801        | chr11_6088667  | C824        | chr11_17292835 |
| C779        | chr10_18098744      | C802        | chr11_6472086  | C825        | chr11_17489208 |
| C780        | chr10_18302926      | C803        | chr11_7542820  | C826        | chr11_17697337 |
| C781        | chr10_18583084      | C804        | chr11_8083891  | C827        | chr11_17908099 |

|          |                     |          |                     |          |                |
|----------|---------------------|----------|---------------------|----------|----------------|
| C782     | RF4                 | C805     | chr11_8247118       | C828     | STV11          |
| SNP Code | SNP Id.             | SNP Code | SNP Id.             | SNP Code | SNP Id.        |
| C829     | SWEET14_PRO1        | C852     | chr11_23023708      | C875     | XA26_1         |
| C830     | SWEET14_2           | C853     | chr11_23080452      | C876     | XA4_2          |
| C831     | chr11_18290104      | C854     | chr11_23083051      | C877     | chr11_28625316 |
| C832     | chr11_18936070      | C855     | chr11_23231455      | C878     | chr11_28966693 |
| C833     | chr11_18993024      | C856     | IRGSP1_C11_23731426 | C879     | chr12_350921   |
| C834     | chr11_19648542      | C857     | chr11_24086107      | C880     | chr12_2324105  |
| C835     | chr11_19898835      | C858     | chr11_24100905      | C881     | chr12_2651274  |
| C836     | chr11_20074439      | C859     | chr11_24585862      | C882     | chr12_3086293  |
| C837     | chr11_20239426      | C860     | chr11_25135188      | C883     | chr12_3217524  |
| C838     | chr11_20647651      | C861     | PI54_5              | C884     | chr12_3285571  |
| C839     | chr11_20837771      | C862     | chr11_25279481      | C885     | chr12_3544726  |
| C840     | chr11_21190115      | C863     | chr11_25432067      | C886     | chr12_4141420  |
| C841     | chr11_21446099      | C864     | chr11_25811598      | C887     | chr12_4433511  |
| C842     | chr11_21689303      | C865     | chr11_26300403      | C888     | chr12_4554103  |
| C843     | chr11_21691103      | C866     | IRGSP1_C11_27391141 | C889     | chr12_5041059  |
| C844     | chr11_22044151      | C867     | IRGSP1_C11_27571141 | C890     | chr12_7114076  |
| C845     | XA23_2              | C868     | chr11_27603799      | C891     | chr12_7445812  |
| C846     | IRGSP1_C11_22303236 | C869     | chr11_27817978      | C892     | chr12_7917509  |
| C847     | chr11_22440795      | C870     | PIK_2               | C893     | chr12_8070782  |
| C848     | chr11_22453819      | C871     | PIK_1               | C894     | chr12_8240608  |
| C849     | chr11_22562351      | C872     | PIKH_2              | C895     | chr12_8794364  |
| C850     | PB1_1               | C873     | PIKH_1              | C896     | chr12_8913217  |

|             |                |             |                     |             |                |
|-------------|----------------|-------------|---------------------|-------------|----------------|
| C851        | chr11_22912310 | C874        | chr11_27994133      | C897        | chr12_9120135  |
| SNP<br>Code | SNP Id.        | SNP<br>Code | SNP Id.             | SNP<br>Code | SNP Id.        |
| C898        | chr12_9540170  | C916        | chr12_15960393      | C934        | chr12_23108164 |
| C899        | chr12_10051752 | C917        | IRGSP1_C12_15966147 | C935        | chr12_23190179 |
| C900        | chr12_10469146 | C918        | chr12_16287347      | C936        | chr12_23387696 |
| C901        | chr12_10509878 | C919        | chr12_16591134      | C937        | chr12_23828922 |
| C902        | chr12_11257069 | C920        | chr12_16990670      | C938        | chr12_24088209 |
| C903        | chr12_11720114 | C921        | chr12_17443323      | C939        | chr12_24145303 |
| C904        | chr12_12075622 | C922        | DTY12-1_2           | C940        | chr12_24317071 |
| C905        | chr12_12509917 | C923        | chr12_17571574      | C941        | chr12_24417433 |
| C906        | chr12_12904225 | C924        | chr12_18003414      | C942        | chr12_24705450 |
| C907        | chr12_13248798 | C925        | chr12_18881059      | C943        | chr12_24913573 |
| C908        | chr12_13764151 | C926        | chr12_19161731      | C944        | chr12_25490919 |
| C909        | chr12_14060565 | C927        | chr12_19522102      | C945        | chr12_25756224 |
| C910        | chr12_14489210 | C928        | chr12_19578931      | C946        | chr12_26259494 |
| C911        | chr12_14599449 | C929        | chr12_19829588      | C947        | chr12_26463351 |
| C912        | chr12_14835375 | C930        | chr12_21446549      | C948        | chr12_26665728 |
| C913        | chr12_14936674 | C931        | chr12_21731719      | C949        | chr12_27023424 |
| C914        | chr12_15140411 | C932        | chr12_22600624      | C950        | chr12_27304351 |
| C915        | chr12_15342492 | C933        | chr12_23066809      |             |                |
